# Supplementary material for: Molecular evidence of Rickettsia spp. in ixodid ticks and rodents in suburban, natural and rural habitats in Slovakia
Source: Parasit Vectors. 2017 Mar 24;10:158. doi: 10.1186/s13071-017-2094-8 (PMC5366151; doi:10.1186/s13071-017-2094-8)
Supplement: Additional file 1: — PCR protocols for the detection of Rickettsia spp. and Coxiella burnetii. (DOCX 21 kb) [file 13071_2017_2094_MOESM1_ESM.docx]

**Additional file 1**

**PCR protocols for the detection of *Rickettsia* spp. and *Coxiella burnetii***

**1. PCR amplification to detect *Rickettsia* spp. based on the *gltA* gene**

*Rickettsia* genus-specific RpCS877F (5´-GGGGACCTGCTCACGGCGG-3´) and RpCS1258R (5´-ATTGCAAAAAGTACAGTGAACA-3´) primers were used to amplify a 381 bp fragment. PCR reactions were carried out in a volume of 20 μl containing 4 μl of ticks genomic DNA (cca 50 ng/ μl) and 10 μl of Master mix (DyNAzymeTM PCR Master Mix, Finnzymes, Finland), 1 μl of each primer (final concentration 0.5 μM) and 5 μl of nuclease free water. Amplification was performed on thermocycler PTC-119 200 Peltier Thermal Cycler (MJ Research, Canada). The thermal cycle reaction consisted of an initial 2 min denaturation at 95°C, followed by 35 cycles at 95°C for 20 s, 53°C for 30 s, and 60°C for 2 min, with a final extension at 72°C for 10 min.

Another *Rickettsia* genus-specific CS78 (5´-GCAAGTATCGGTGAGGATGTA-3´) and CS323 (5´-GCTTCCTTAAAATTCAATAAATC-3´) primers were used to amplify an additional 401 bp long fragment of *gltA* gene. PCR reactions were carried out in a volume of 10 μl containing 1 μl of ticks genomic DNA (cca 50 ng/ μl) and 5 μl of Master mix (DyNAzymeTM II PCR Master Mix (Finnzymes), 0,5 μl of each primer (final concentration 0.5 μM) and 3 μl of nuclease free water. Amplification was performed on thermocycler PTC-119 200 Peltier Thermal Cycler (MJ Research, Canada). The thermal cycle reaction consisted of an initial 2 min denaturation at 95°C, followed by 35 cycles at 95°C for 20 s, 52°C for 30 s, and 72°C for 30 s, with a final extension at 72°C for 7 min.

**2. PCR amplification to detect *Rickettsia* spp. based on the *sca4* gene**

*Rickettsia* genus-specific D767f (5´-CGATGGTAGCATTAAAAGCT-3´) and D1390r (5´-CTTGCTTTTCAGCAATATCAC-3´) primers were used to amplify a 623 bp fragment. PCR reactions were carried out in a volume of 20 μl containing 4 μl of ticks genomic DNA (cca 50 ng/ μl) and 10 μl of Master mix (SuperHot PCR Master Mix, Bioron, Germany), 1 μl of each primer (10 μM), 1 μl of 100mM MgCl2 and 3 μl of nuclease free water. Amplification was performed on thermocycler PTC-119 200 Peltier Thermal Cycler (MJ Research, Canada). The thermal cycle reaction consisted of an initial 2 min denaturation at 95°C, followed by 35 cycles at 95°C for 20 s, 50°C for 30 s, and 72°C for 30 s, with a final extension at 72°C for 10 min.

**3. PCR amplification to detect *Rickettsia* spp. based on the 16S rRNAgene**

Primers 800f and rP2 were used to amplify rickettsial fragment of 16S rRNA. PCR reactions were carried out in a volume of 20 μl containing 4 μl of ticks genomic DNA (cca 50 ng/ μl) and 10 μl of Master mix (SuperHot PCR Master Mix, Bioron, Germany), 1 μl of each primer (10 μM), 1 μl of 100mM MgCl2 and 3 μl of nuclease free water. Amplification was performed on TPersonal Tthermocycler (Biometra, Germany). The thermal cycle reaction consisted of an initial 2 min denaturation at 95°C, followed by 40 cycles at 95°C for 15 s, 42°C for 30 s, and 72°C for 30 s, with a final extension at 72°C for 7 min.

**4. PCR amplification to detect *Rickettsia* spp. based on the *ompA* gene**

Spotted fever group specific primers RR190.70F (5´-ATGGCGAATATTTCTCCAAAAA-3´) and RR190.701R (5´-GTTCCGTTAATGGCAGCATCT-3´) were used to amplify a 632 bp fragment. PCR reactions were carried out in a volume of 20 μl containing 4 μl of ticks genomic DNA (cca 50 ng/ μl) and 10 μl of Master mix (SuperHot PCR Master Mix, Bioron, Germany), 1 μl of each primer (10 μM), 1 μl of 100mM MgCl2 and 3 μl of nuclease free water. Amplification was performed on TPersonal Thermocycler (Biometra, Germany). The thermal cycle reaction consisted of an initial 5 min denaturation at 95°C, followed by 35 cycles at 95°C for 20 s, 54°C for 30 s, and 72°C for 30 s, with a final extension at 72°C for 10 min.

**5. PCR amplification to detect *Rickettsia* spp. based on the *ompB* gene**

For detection of a part of *ompB* gene of rickettsiae PCR using primers rompBOF (5´-GTAACCGGAAGTAATCGTTTCGTAA-3´) and rompBOR (5´-GCTTTATAACCAGCTAAACCACC-3´) amplifying 511bp long amplicon were employed. PCR reactions (in total volume of 10 μl) were performed on thermocycler Labcycler (SensoQuest, Germany) containing 5 μl 2x Master mix (DreamTaq Green PCR Master Mix 2x, Thermo Fisher Scientific, USA), 1 μl of each primer (10 μM), 2 μl of nuclease free water and 1 μl of template DNA. The thermal cycle reaction consisted of an initial 13 min denaturation at 95°C, followed by 35 cycles at 95°C for 30 s, 55°C for 30 s, and 72°C for 2 min and ended with a final extension at 72°C for 10 min.

**6. PCR amplification to detect *Coxiella burnetii* based on the *com1* gene**

*C. burnetii*-specific CBCOS (5´-GCTGTTTCTGCCGAACGTAT-3´) and CBCOE (5´-AGACAACGCGGAGGTTTTTA-3´) primers were used to amplify a 493 bp fragment. PCR reactions were carried out in a volume of 10 μl containing 1.5 μl of ticks genomic DNA (cca 50 ng/ μl) and 0.1 μl of polymerase, 1 μl Buffer B1 (HOT Fire Pol® DNA Polymerase, Solis BioDyne, Estonia), 0.5 μl of each primer (10 μM), 0.6 μl of MgCl2, 0.1 μl of dNTP and 5.7 μl of nuclease free water. Amplification was performed on thermocycler Labcycler (SensoQuest, Germany). The thermal cycle reaction consisted of an initial 15 min denaturation at 95°C, followed by 35 cycles at 95°C for 40 s, 56°C for 45 s, and 72°C for 40 s, with a final extension at 72°C for 10 min.

**7. TaqMan PCR assay to detect *Rickettsia helvetica* based on the23S rRNA gene**

The primers and probe used were Rickhelv.147f (5´-TTTGAAGGAGACACGGAACACA-3´) Rickhelv.211r (5´-TCCGGTACTCAAATCCTCACGTA-3´), and Rickhelv.170p (5´-FAM-AACCGTAGCGTACACTTA-MGBNFQ-3´). The real-time PCR mixtures contained 10 μl of the 2 x Master mix (DyNAmoTM Probe qPCR, Finnzymes, Finnland), final concentrations of 100 nM of each primer and 100 nM of the probe, and 4 μl of the template in a total volume of 20 μl. The *R. helvetica*-specific real-time PCR assay was performed using an Bio-Rad CFX96TM Real-Time System, with an initial step of 50°C for 2 min and a denaturation step of 95°C for 15 min, followed by 45 cycles of 95°C for 15 s and 60°C for 1 min.
